# Supplementary material
Source: Springer Nature journal article supplement (https://www.springermedizin.de/resource/supplementary/12890_2011_296_MOESM1_ESM.pdf/9504872)

# FLOWCHART

## ACCURATE: Asthma Control Cost-Utility RAndomized Trial Evaluation

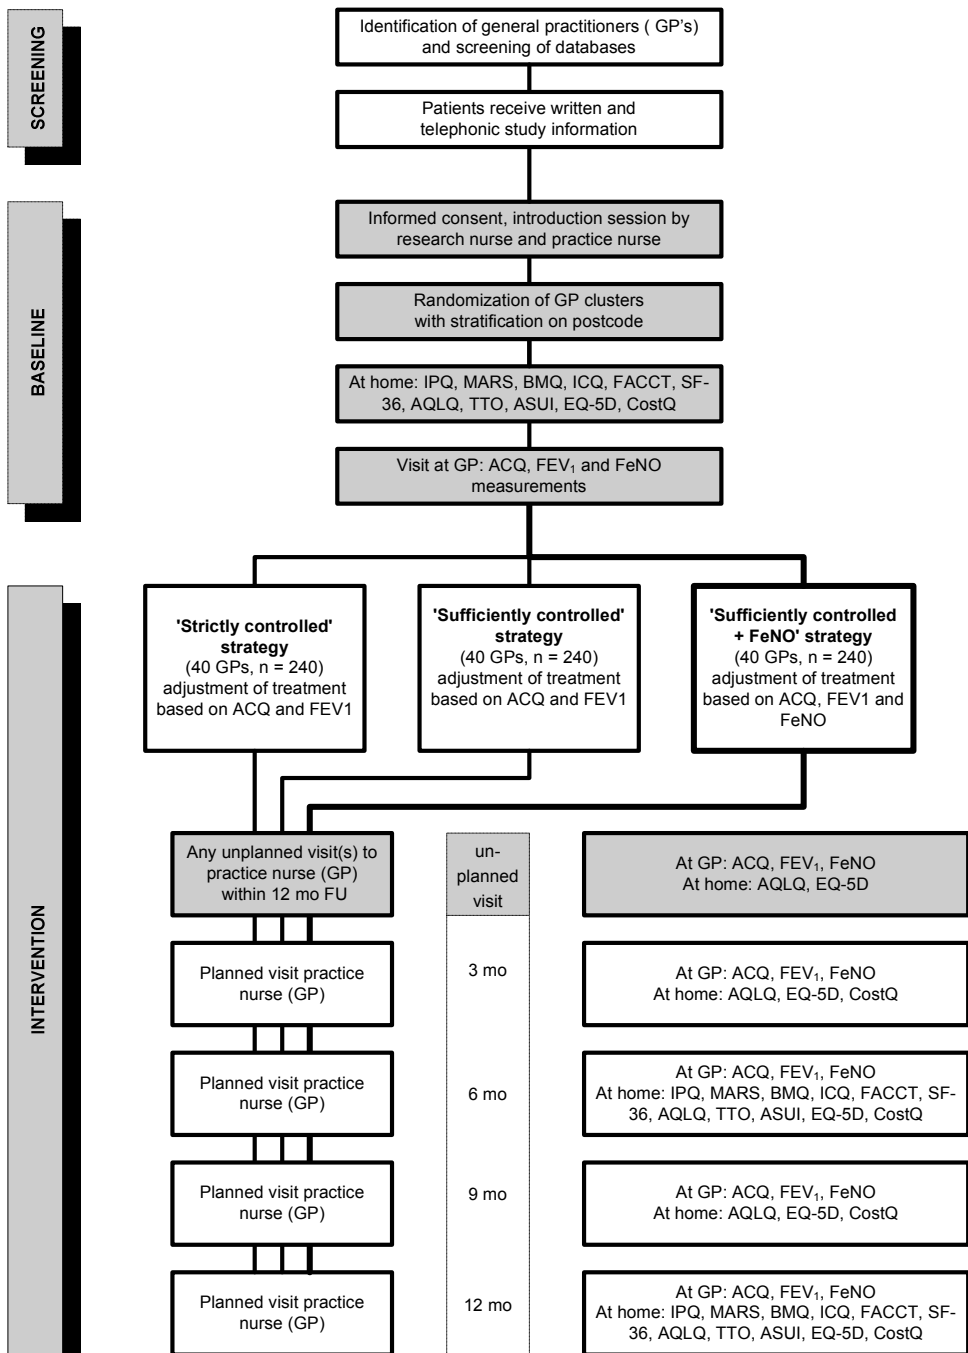

Supplement: MOESM1 [file 9504872]
